# Supplementary material for: Stepwise dimerization of double [2 + 2] reaction in the co-crystals of 1,5-bis(4-pyridyl)-1,4-pentadiene-3-one and phloroglucinol: a single-crystal to single-crystal transformation
Source: Royal Society of Chemistry journal article supplement (doi:10.1039/b813721h), 2008-01-01

# **Stepwise Dimerization of Double [2+2] reaction in the Co-crystals of 1,5-bis(4-pyridyl)-1,4-pentadiene-3-one and Phloroglucinol: A Single Crystal to Single Crystal Transformation**

*Ramkinkar Santra and Kumar Biradha\**

*Supporting Information (8 pages)*

*(synthesis details, NMR-assignment, Hydrogen bonding details and NMR spectra)*

### **Crystallization of 2 :**

A (1:1) mixture of resorcinol (0.020g) and **1** (0.0436g) were dissolved in ethyl acetate (7ml.) and left for crystallization. Brownish crystals of **2** were formed after 36 hours in 75% yield. The crystallization with many other solvents or solvent mixtures such as acetone, acetonitrile benzene-THF, toluene-acetonitrile resulted in similar type of co-crystals. The similarity of these crystals has been identified by determining the unit cell parameters and melting points (185°C-190°C).

### **Crystallization of 3:**

A 1:1 mixture of **1** (0.05g, .212mmol) and phloroglucinol, 2H<sub>2</sub>O (0.0343g) was dissolved in 15ml of acetonitrile and left at rt. in dark. Light yellow rod like crystal were obtained in 69% (0.0584g) yield in 12 hour. mp: single crystal started to loose solvent above 75°C then melting started at 185-190°C with gradual blackening and no clear melting up to 300°C. <sup>1</sup>H NMR: (400 MHz, D<sub>6</sub>DMSO) δ 2.057 (s; 3H, acetonitrile proton); δ 5.634 (s; 3H, phloroglucinol-OH); δ 7.559 (d; J = 16 Hz; 2H, alkene proton β to Py); δ 7.730 (d; J = 5.2 Hz; 4H, Py-βH); δ 7.778 (d; J = 16 Hz; 2H, alkene proton α to Py); δ 8.668 (d; J = 5.2 Hz; 4H, Py-αH); δ 8.925 (s; 3H, phloroglucinol phenyl proton).

### **Preparation of 4:**

Crystals, after separation from crystallization solvent, were directly exposed under sunlight or uv-light (medium pressure Hg vapour lamp: 350-420 nm) putting on watch-glass. Larger crystals started to changing white in colour with disintegrating into smaller fragments while smaller crystal remain intact and 100% reaction occurred in 3-4 hours or 15 minute in sunlight or uv-light respectively (checked by TLC). <sup>1</sup>H NMR: (400 MHz, D<sub>6</sub>DMSO) δ 2.057 (s; 6H); δ 4.429 (d; J = 5.6 Hz; 4H, Cy-butane proton β to Py); δ 4.642 (d; J = 5.6 Hz; 4H, Cy-butane proton α to Py); δ 5.633 (s; 6H) δ 7.080 (d; J = 5.6 Hz; 8H, Py-βH); δ 8.293 (d; J = 5.6 Hz; 8H, Py-αH); δ 8.928 (s; 6H).

#### **Separation of TCD from 4:**

About 1g of 100% photolized product **3** was dissolved in 50 ml water by adding 1N HCl solution dropwise (until all material dissolved). The yellow coloured solution was extracted with 50 ml ethyl acetate 3-4 times. The aqueous part was then neutralized by dropwise addition of dilute aqueous tri-ethylamine solution. The white precipitation obtained was filtered and washed with water and dried. The dimer **TCD** obtained in quantitative yield were recrystallized from THF as a white crystals. mp: 210-215°C.

#### **Generation of partially reacted material of 3 & the spectral proof for stepwise formation of TCD:**

A partially reacted **3** in which TCD is in 40-60% in mole ratio can be generated by irradiating crystals directly either in sunlight for 2 hours or in UV light for 6 minutes putting on watch glass.

For monitoring the photolysis reaction of **3** by <sup>1</sup>H NMR spectra the light (hν) source used was room light i.e. of low intensity. From this study and also from the <sup>1</sup>H NMR spectra for that irradiated 2 hours in sunlight we characterized a full set of peak position for the product of single (2+2) reaction (scheme-1): <sup>1</sup>H NMR: (400 MHz, D<sub>6</sub>DMSO) δ 4.295 (d; *J* = 6 Hz; 2H, Cy-butane proton β to Py); δ 4.784 (d; *J* = 6 Hz; 2H, Cy-butane proton α to Py), δ 7.121 (d; *J* = 16 Hz; 2H, alkene proton β to Py); δ 7.159 (d; *J* = 5.6 Hz; 4H, Py- βH attach to Cy-butane); δ 7.542 (d; *J* = 5.6 Hz; 4H, Py- βH attach to alkene); δ 7.554 (d; *J* = 16 Hz; 2H, alkene proton α to Py); δ 8.316 (d; *J* = 5.6 Hz; 4H, Py- αH attach to Cy-butane); δ 8.533 (d; *J* = 5.6 Hz; 4H, Py- αH attach to alkene). Table.1 shows the significant shift in δ value for that **1**, dimer **I** and the product of single (2+2) reaction.

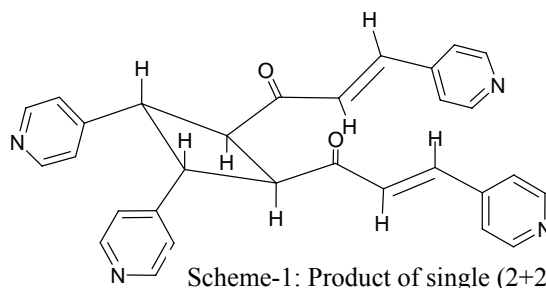

**TABLE 1: Showing different <sup>1</sup>HNMR Position ( $\delta$  value).**

| Comp.                   | Py- $\alpha$ H<br>Attach<br>To<br>Cy-<br>butane | Py- $\beta$ H<br>Attach<br>To<br>Cy-butane | Py- $\alpha$ H<br>Attach<br>to<br>alkene | Py- $\beta$ H<br>Attach<br>to<br>alkene | Alkene<br>Proton<br>$\alpha$ -to<br>Py | Alkene<br>Proton<br>$\alpha$ -to<br>keto | Butane<br>Proton $\alpha$ -to<br>Py | Butane<br>Proton<br>$\alpha$ -to keto |
|-------------------------|-------------------------------------------------|--------------------------------------------|------------------------------------------|-----------------------------------------|----------------------------------------|------------------------------------------|-------------------------------------|---------------------------------------|
| Reactant<br>1           |                                                 |                                            | 8.668                                    | 7.730                                   | 7.778                                  | 7.559                                    |                                     |                                       |
| Single<br>(2+2)<br>Pdt. | 8.316                                           | 7.159                                      | 8.533                                    | 7.542                                   | 7.554                                  | 7.121                                    | 4.784                               | 4.295                                 |
| Double<br>(2+2)<br>Pdt. | 8.293                                           | 7.080                                      |                                          |                                         |                                        |                                          | 4.642                               | 4.429                                 |

Crystal data for **1** (C<sub>15</sub>H<sub>12</sub>N<sub>2</sub>O<sub>1</sub>):  $M=236.27$ , Monoclinic, P2(1)/n,  $a= 8.1243(4)$  Å,  $b= 15.3477(7)$  Å,  $c= 10.0546(4)$  Å,  $\beta= 104.0370(10)^\circ$ ,  $V= 1216.26(9)$  Å<sup>3</sup>,  $Z = 4$ ; 2089 reflections out of 2932 unique reflections with  $I > 2\sigma(I)$ ,  $2.47 < \theta < 28.00^\circ$ , final  $R_1 = 0.0441$ ,  $wR_2 = 0.1266$ .

Crystal data for **2**: (C<sub>21</sub>H<sub>18</sub>N<sub>2</sub>O<sub>3</sub>):  $M=346.37$ , Monoclinic, P2(1)/c,  $a= 9.543(4)$  Å,  $b= 21.387(9)$  Å,  $c= 8.802(4)$  Å,  $\beta= 94.868(13)^\circ$ ,  $V= 1790.0(13)$  Å<sup>3</sup>,  $Z = 4$ ; 2520 reflections out of 3912 unique reflections with  $I > 2\sigma(I)$ ,  $1.90 < \theta < 27.16^\circ$ , final  $R_1 = 0.0427$ ,  $wR_2 = 0.1155$ .

Hydrogen Bonding parameter for **2**

```
O2A -- H2AO .. N11 [ 4754.01] 1.829(19) 2.753(2) 174.4(17)
O1A -- H1AO .. N21 [          ] 1.87(3) 2.759(2) 161(3)
C5 -- H5 .. O2A [ 4454.02] 2.55 3.205(2) 127
C15 -- H15 .. O2A [ 2445.02] 2.60 3.319(3) 135
```

Translation of ARU-code to Equivalent Position Code

```
=====
[ 4454. ] = -1+x,1/2-y,-1/2+z
[ 2445. ] = -1-x,-1/2+y,1/2-z
[ 4754. ] = 2+x,1/2-y,-1/2+z
```

Hydrogen Bonding parameter for **3**

```
O(1) -- H(10) .. N(21) [ 3565.01] 1.86(4) 2.761(3) 177(3)
O(3) -- H(30) .. N(31) [ 4464.01] 1.94(3) 2.803(3) 171(3)
O(5) -- H(50) .. N(100)[          ] 2.03(3) 2.828(3) 162(3)
C(11) -- H(11) .. O(5) [ 5555.02] 2.55 3.350(3) 145
O(3) .... C(101) [ 7555.03] 3.202(3) < 3.22 -0.02
```

Hydrogen Bonding parameter for **4**

```
O1A -- H1AO .. N100 [ 3656.03] 1.92(6) 2.811(7) 153(5)
O3A -- H3AO .. N11 [ 4564.01] 1.78(6) 2.747(6) 173(5)
O2A -- H2AO .. N21 [ 4564.01] 1.75(8) 2.773(6) 169(7)
C2 -- H2 .. O1A [ 5555.02] 2.47 3.323(7) 145
C101 -- H10A .. O3A [ 5545.02] 2.55 3.420(7) 151
```

Translation of ARU-code to Equivalent Position Code

=====

[ 2756. ] = 2-x,y,3/2-z  
[ 4564. ] = x,1-y,-1/2+z  
[ 5555. ] = 1/2+x,1/2+y,z  
[ 3656. ] = 1-x,-y,1-z  
[ 5545. ] = 1/2+x,-1/2+y,z

Hydrogen Bonding parameters for 5.

|        |        |        |    |        |        |          |   |          |           |          |
|--------|--------|--------|----|--------|--------|----------|---|----------|-----------|----------|
| O1A    | --     | H1AO   | .. | N21    | [      |          | ] | 1.80(4)  | 2.755(4)  | 170(3)   |
| O3A    | --     | H3AO   | .. | N11    | [      | 2756.01] |   | 1.76(4)  | 2.765(4)  | 176(3)   |
| O2A    | --     | H2AO   | .. | N100   | [      |          | ] | 1.94(5)  | 2.810(5)  | 164(4)   |
| C2'    | -->    | H2'    | .. | O2A    | [      | 7656.02  |   | 2.47     | 3.352(11) | 149      |
| H10A   | ....   | O3A    |    |        | [      | 7556.02] |   | 2.6604   | < 2.72    | -0.06    |
| 0.0617 | 0.1034 | 0.3480 |    | 0.0113 | 0.1843 | 0.4603   |   |          |           |          |
| C101   |        | 138.06 |    |        |        |          |   |          |           |          |
| O3A    | ....   | C101   |    |        | [      | 5455.03] |   | 3.420(7) | 3.22      | 0.20     |
| 0.4917 | 0.3097 | 0.4587 |    | 0.4031 | 0.3782 | 0.3105   |   | C5A      |           | 160.8(3) |

Translation of ARU-code to Equivalent Position Code

=====

[ 2756. ] = 2-x,y,3/2-z  
[ 7656. ] = 3/2-x,1/2-y,1-z

<sup>1</sup>H NMR spectra of 3.

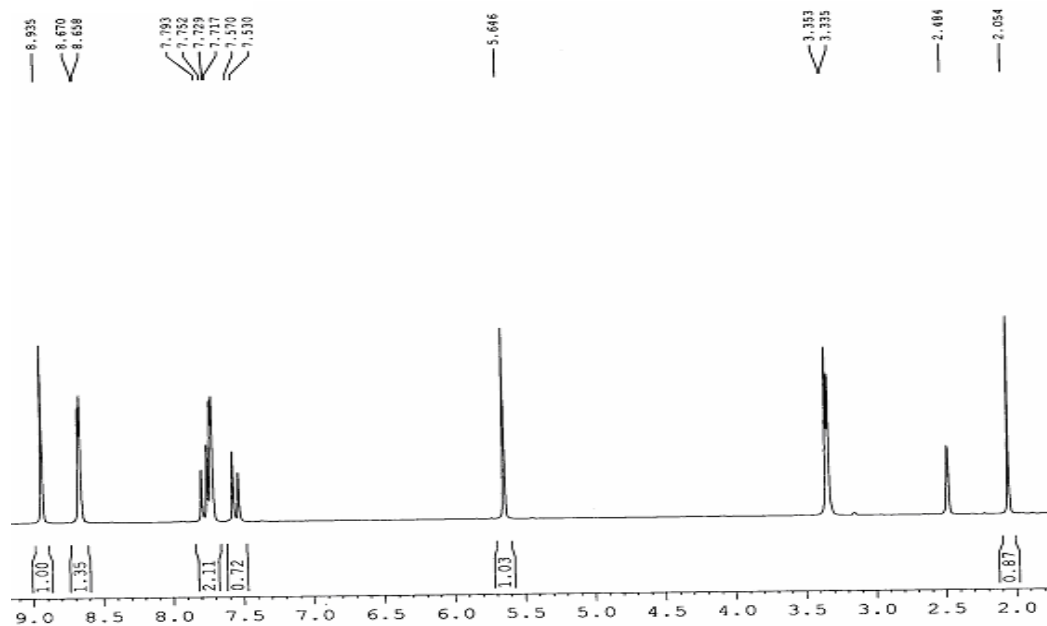

<sup>1</sup>H NMR spectra of 4.

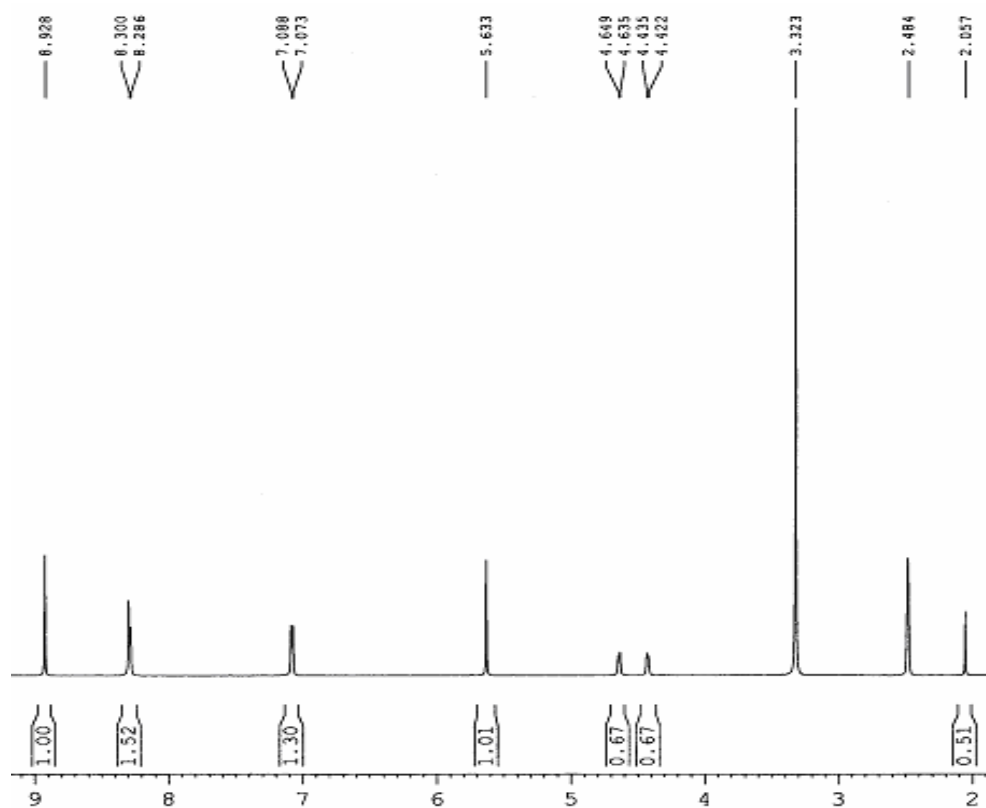

$^1\text{H}$ NMR spectra of partially irradiated **3** in sunlight for 2 hours.

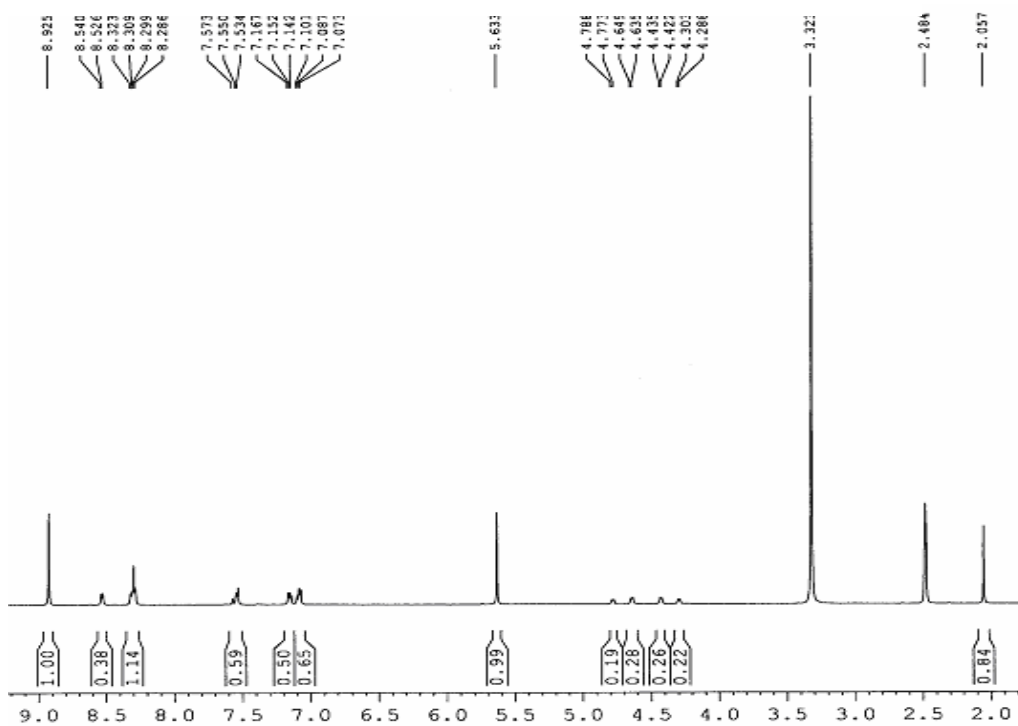

$^1\text{H}$ NMR spectra of **3** after 2 days irradiation in room light.

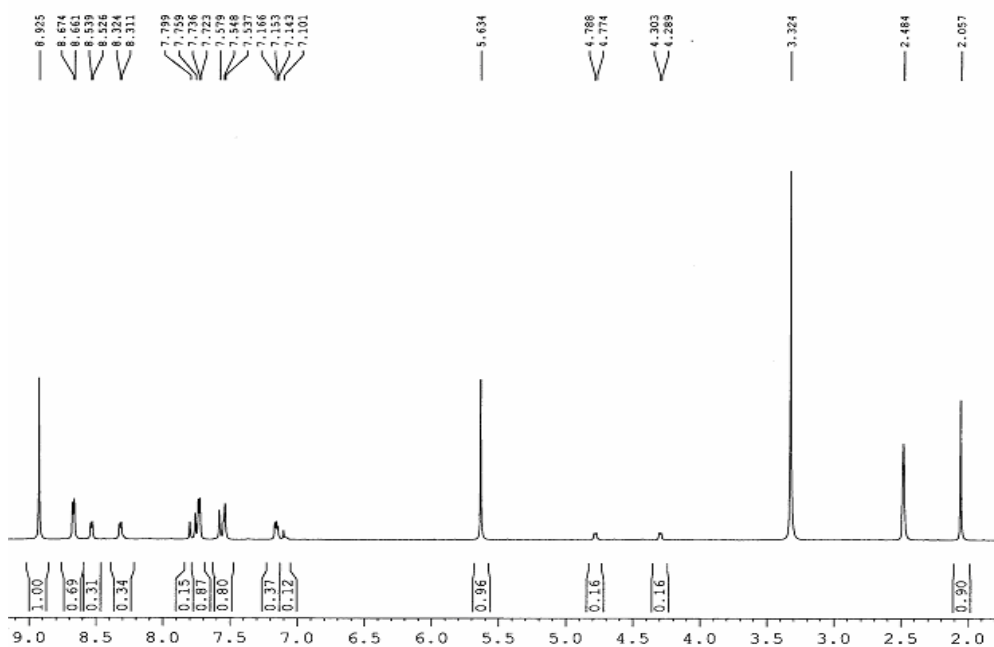



$^1\text{H}$ NMR spectra of **3** after 4 days irradiation in room light.

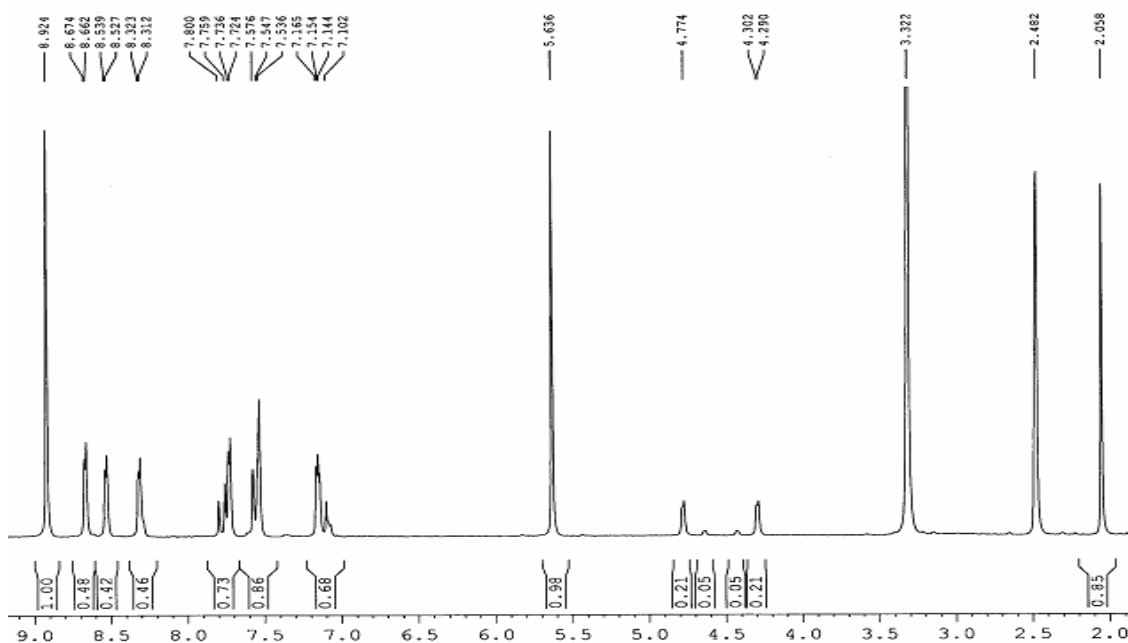

$^1\text{H}$ NMR spectra of **3** after 15 days irradiation in room light.

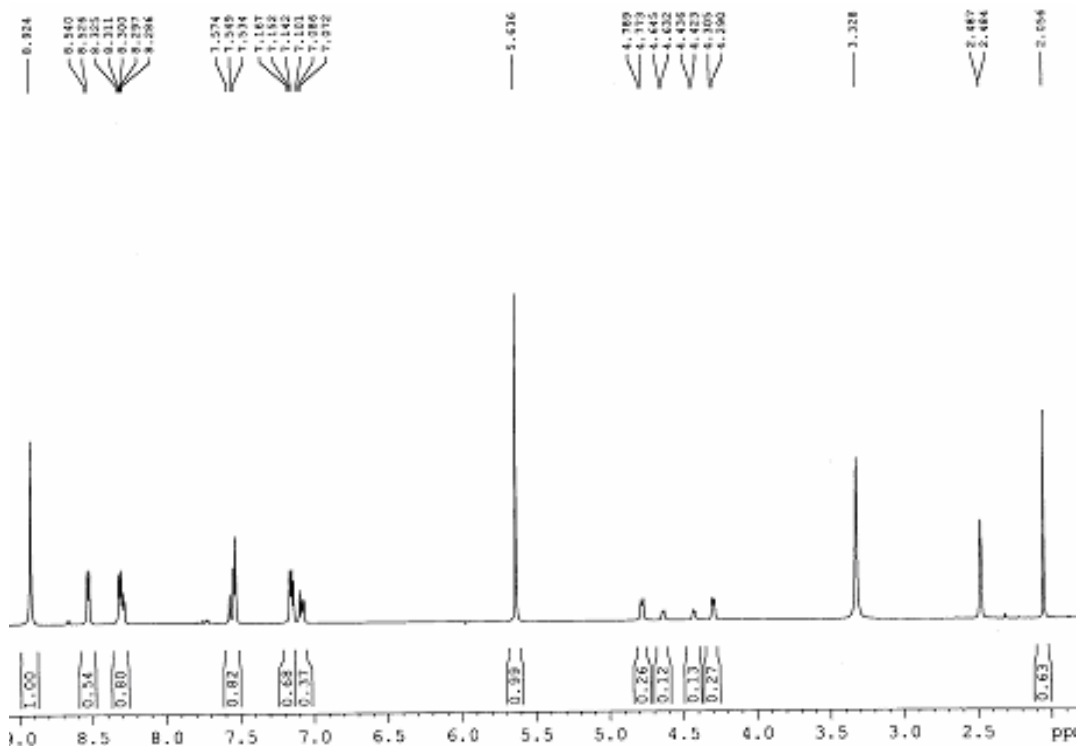

Supplement: b813721h.pdf [file b813721h.pdf]
